# Supplementary material for: New 10 Be exposure ages improve Holocene ice sheet thinning history near the grounding line of Pope Glacier, Antarctica
Source: Copernicus journal article supplement (doi:10.5194/tc-16-4887-2022), 2022-12-06
Supplement: Supplementary file 1 [file tc-16-4887-2022-supplement.zip]

Archive with 4 entries (4 files):
- Table_S2.xlsx
- Table_S1.xlsx
- tc-16-4887-2022-supplement-title-page.pdf
- Figure_S3.pdf
