# Supplementary material for: New 10 Be exposure ages improve Holocene ice sheet thinning history near the grounding line of Pope Glacier, Antarctica
Source: Copernicus journal article supplement (doi:10.5194/tc-16-4887-2022), 2022-12-06
Supplement: Supplementary file 1 [file tc-16-4887-2022-supplement.zip › Table_S2.xlsx]

## Sheet: Table S2
Table S2
Geomorphic data
											Dimensions
Sample ID	BAS ID	Latitude DD	Longitude DD	Elevation (m a.s.l.)	Type	Lithology	Shielding Factor	Shape description	Shape elongate (1) - spherical (5)	Shape prolate (1) - equant (3)	Long axis (cm)	Medium axis (cm)	Short axis (cm)	Weathering Classification
CIN-101	R15.8.1	-75.2194	-111.023	239	erratic	gneiss	0.999842	subangular	1	1	15	12	9	3
CIN-102	R15.8.2	-75.2194	-111.023	239	erratic	gneiss	0.998914	subangular - subrounded	1	1	30	14	13	2
CIN-103	R15.8.3	-75.2194	-111.022	238	erratic	granite	0.999809	subangular	1	1	13	8	6	3
CIN-104	R15.8.4	-75.2193	-111.022	233	erratic	aplite	0.995369	subrounded	4	3	10	9	9	3
CIN-105	R15.8.5	-75.2193	-111.021	229	erratic	granite	0.999594	angular - subangular	2	1	13	7.5	6	1 - 2
CIN-106	R15.8.6	-75.2193	-111.021	229	erratic	gneiss	0.99966	subrounded	2	2	22	16	8	3
CIN-107	R15.8.7	-75.219	-111.02	225	erratic	gneiss	0.999397	subrounded	4	2	13	11.5	5	1 -2
CIN-108	R15.8.8	-75.2165	-111.02	181	erratic	granite	0.999362	subrounded	2	1	10	8	6	2
CIN-109	R15.8.9	-75.2164	-111.02	178	erratic	gneiss	0.9995	subrounded	3	2	25	22	11	3
CIN-110	R15.8.10	-75.2164	-111.02	178	erratic	aplite	0.9995	subangular	2	2	19	14	8	2 - 3
CIN-111	R15.8.11	-75.2163	-111.019	180	erratic	gneiss	0.999244	angular	2	1	13	8	7	2
CIN-112	R15.8.12	-75.2163	-111.018	179	erratic	aplite	0.999433	subangular	3	2	20	18	15	2 - 3
NB = weathering classification
1 = Heavily weathered, surrounded by spallation products; no iron staning or pitting on the upper surface.
2 = Moderately weathered surfaces, iron stained, but flaky in parts with some spalling/ pitting of the upper surface.
3 = Intact slightly weathered or unweathered, unspalled, some with well developed weathering rind / dark up to 1 - 3 cm on exposed surfaces.
