# Supplementary material for: New 10 Be exposure ages improve Holocene ice sheet thinning history near the grounding line of Pope Glacier, Antarctica
Source: Copernicus journal article supplement (doi:10.5194/tc-16-4887-2022), 2022-12-06
Supplement: Supplementary file 1 [file tc-16-4887-2022-supplement.zip › tc-16-4887-2022-supplement-title-page.pdf]

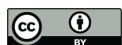

*Supplement of*

**New  $^{10}\text{Be}$  exposure ages improve Holocene ice sheet thinning history near the grounding line of Pope Glacier, Antarctica**

**Jonathan R. Adams et al.**

*Correspondence to:* Jonathan R. Adams ([j.adams19@imperial.ac.uk](mailto:j.adams19@imperial.ac.uk))

- [tc-16-4887-2022-supplement-title-page.pdf](#)
- [Figure\\_S3.pdf](#)
- [Table\\_S1.xlsx](#)
- [Table\\_S2.xlsx](#)

The copyright of individual parts of the supplement might differ from the article licence.
